# Supplementary material for: Ragulator and GATOR1 complexes promote fission yeast growth by attenuating TOR complex 1 through Rag GTPases
Source: eLife. 2017 Dec 4;6:e30880. doi: 10.7554/eLife.30880 (PMC5752196; doi:10.7554/eLife.30880)
Supplement: Figure 6—source data 1. [file elife-30880-fig6-data1.xlsx]

## Sheet: Sheet1
	Source data for Figure 6K
	Raw data (area of peaks quantified by ImageJ)
	Strain			wild-type (-N)	wild-type	gtr1∆	gtr2∆	iml1∆	tsc2∆
	Replicate 1	Area of peak (upper band)		658.899	2666.62	5081.18	5204.88	4840.18	3618.1
		Area of peak (lower band)		13569.4	10216.6	11513	11379.9	11107	14063.4
	Replicate 2	Area of peak (upper band)		841.435	3397.98	5007.35	5267.35	4414.05	2775.03
		Area of peak (lower band)		14313.3	11086.4	10685.1	11570.4	10187.6	10413
	Replicate 3	Area of peak (upper band)		886.021	3231.45	4305.23	3796.28	5800.88	2430.2
		Area of peak (lower band)		14522.9	11260.9	11151.4	8853.42	10935.8	10909
	Replicate 4	Area of peak (upper band)		590.021	3009.86	5074.05	4220.35	3823.98	2024.6
		Area of peak (lower band)		13179.9	11211.1	11442.1	10659.5	10178.5	10118.9
	Summary
	Strain			wild-type (-N)	wild-type	gtr1∆	gtr2∆	iml1∆	tsc2∆
	Percentage of phospho-Sck1		Replicate 1	4.6309	20.6985	30.6202	31.3836	30.3513	20.4627
			Replicate 2	5.5523	23.4597	31.9092	31.2829	30.2298	21.0421
			Replicate 3	5.75004	22.2977	27.8535	30.0108	34.6597	18.2185
			Replicate 4	4.28485	21.1649	30.7217	28.3629	27.3093	16.6723
	Average (%)			5.05452	21.9052	30.2762	30.26	30.6376	19.0989
	STDEV (%)			0.707904	1.23486	1.71783	1.41067	3.02782	2.02478
	T-test (compare with wild-type), p value			1.93207e-06		0.000173377	6.12608e-05	0.00302175	0.0323174
				p < 0.01		p < 0.01	p < 0.01	p < 0.01	p > 0.01
	Percentage of phospho-Sck1 = (area of upper band / total area of upper and lower band)*100
