# Supplementary material for: Ragulator and GATOR1 complexes promote fission yeast growth by attenuating TOR complex 1 through Rag GTPases
Source: eLife. 2017 Dec 4;6:e30880. doi: 10.7554/eLife.30880 (PMC5752196; doi:10.7554/eLife.30880)
Supplement: Figure 7—figure supplement 1—source data 1. [file elife-30880-fig7-figsupp1-data1.xlsx]

## Sheet: Sheet2
	Source data for Figure 7-figure supplement 1G
	Raw data
	Strain			wild-type	tor2-13	tor2-287	gtr1∆	gtr1QL	iml1∆	lam1∆
	Replicate 1		OD600	0.178	0.142	0.143	0.226	0.175	0.252	0.259
			Cell Concentration	1160000	1760000	1930000	1720000	1170000	1890000	1820000
			D Mean (μｍ)	5.559	5.076	5.003	5.709	5.86	5.86	5.888
	Replicate 2		OD600	0.161	0.151	0.149	0.251	0.249	0.287	0.296
			Cell Concentration	1530000	1830000	2090000	1740000	1820000	2070000	2350000
			D Mean (μｍ)	5.566	5.044	4.903	5.766	5.724	5.871	5.82
	Replicate 3		OD600	0.188	0.127	0.153	0.188	0.109	0.231	0.299
			Cell Concentration	991000	1440000	2290000	1360000	689000	1590000	2410000
			D Mean (μｍ)	5.608	5.144	4.809	5.762	5.838	5.961	5.77
	Summary
	Strain			wild-type	tor2-13	tor2-287	gtr1∆	gtr1QL	iml1∆	lam1∆
	D Mean (μｍ)		Replicate 1	5.559	5.076	5.003	5.709	5.86	5.86	5.888
			Replicate 2	5.566	5.044	4.903	5.766	5.724	5.871	5.82
			Replicate 3	5.608	5.144	4.809	5.762	5.838	5.961	5.77
	Average (μｍ)			5.57767	5.088	4.905	5.74567	5.80733	5.89733	5.826
	STDEV (μｍ)			0.0265016	0.0510686	0.0970155	0.0318172	0.0730023	0.0554106	0.0592284
	T-test (compare with wild-type), p value				0.000335986	0.00218264	0.00121725	0.0109044	0.00171517	0.00446246
					p < 0.03	p < 0.03	p < 0.03	p < 0.03	p < 0.03	p < 0.03
