# Supplementary material for: Ragulator and GATOR1 complexes promote fission yeast growth by attenuating TOR complex 1 through Rag GTPases
Source: eLife. 2017 Dec 4;6:e30880. doi: 10.7554/eLife.30880 (PMC5752196; doi:10.7554/eLife.30880)
Supplement: Supplementary File 1. [file elife-30880-supp1.xlsx]

## Sheet: Sheet1
Supplementary File 1
Supplementary File 1: List of key resources used in this study
Reagent type (species) or resource	Designation	Source or reference	Identifiers	Additional information
strain, strain background (Schizosaccharomyces pombe)	972/CA1	Laboratory stock	ATCC24843	Genotype: h-
strain, strain background (S. pombe)	M5-2g3/CA8106	DOI:10.1534/genetics.109.105379		Genotype: h- rhb1DA4
strain, strain background (S. pombe)	FY21008/CA8413	DOI:10.1111/j.1365-2443.2007.01141.x		Genotype: h+ tor2-287
strain, strain background (S. pombe)	CA8561	This paper		Genotype: h- iml1:13myc(hph)
strain, strain background (S. pombe)	CA8594	This paper		Genotype: h- P3nmt1:5FLAG:npr2(kanMX6)
strain, strain background (S. pombe)	CA8596	This paper		Genotype: h- P3nmt1:5FLAG:npr3(kanMX6)
strain, strain background (S. pombe)	CA8602	This paper		Genotype: h- iml1:13myc(hph) P3nmt1:5FLAG:npr2(kanMX6)
strain, strain background (S. pombe)	CA8604	This paper		Genotype: h- iml1:13myc(hph) P3nmt1:5FLAG:npr3(kanMX6)
strain, strain background (S. pombe)	CA8606	This paper		Genotype: h- npr2:13myc(hph) P3nmt1:5FLAG:npr3(kanMX6)
strain, strain background (S. pombe)	CA8667	This paper		Genotype: h- lam2:13myc(hph)
strain, strain background (S. pombe)	CA8741	This paper		Genotype: h- gtr1:5FLAG(kanMX6) gtr2:13myc(hph)
strain, strain background (S. pombe)	CA8744	This paper		Genotype: h- gtr1:13myc(hph) gtr2:5FLAG(kanMX6)
strain, strain background (S. pombe)	CA8829	This paper		Genotype: h- tor2E2221K(kanMX6)
strain, strain background (S. pombe)	CA8910	This paper		Genotype: h- tor2E2221K(kanMX6) rhb1∆::hph
strain, strain background (S. pombe)	CA8914	This paper		Genotype: h- tsc2∆::kanMX6
strain, strain background (S. pombe)	CA9078	This paper		Genotype: h- ura4-D18 sck1:5FLAG(ura4+)
strain, strain background (S. pombe)	CA9219	This paper		Genotype: h- lam3:13myc(hph)
strain, strain background (S. pombe)	CA9228	This paper		Genotype: h+ lam3:mEGFP(kanMX6)
strain, strain background (S. pombe)	CA9245	This paper		Genotype: h- lam1:13myc(hph)
strain, strain background (S. pombe)	CA9254	This paper		Genotype: h+ lam1:mEGFP(kanMX6)
strain, strain background (S. pombe)	CA9281	This paper		Genotype: h+ tor2-287 gtr1∆::kanMX6
strain, strain background (S. pombe)	CA9283	This paper		Genotype: h+ tor2-287 gtr2∆::kanMX6
strain, strain background (S. pombe)	CA9285	This paper		Genotype: h+ tor2-287 lam2∆::kanMX6
strain, strain background (S. pombe)	CA9287	This paper		Genotype: h+ tor2-287 iml1∆::kanMX6
strain, strain background (S. pombe)	CA9289	This paper		Genotype: h+ tor2-287 npr2∆::kanMX6
strain, strain background (S. pombe)	CA9291	This paper		Genotype: h+ tor2-287 npr3∆::kanMX6
strain, strain background (S. pombe)	CA9375	This paper		Genotype: h+ tor2-287 lam1∆::kanMX6
strain, strain background (S. pombe)	CA9377	This paper		Genotype: h+ tor2-287 lam3∆::kanMX6
strain, strain background (S. pombe)	CA9388	This paper		Genotype: h- gtr1∆::kanMX6
strain, strain background (S. pombe)	CA9390	This paper		Genotype: h- gtr2∆::kanMX6
strain, strain background (S. pombe)	CA9392	This paper		Genotype: h- lam2∆::kanMX6
strain, strain background (S. pombe)	CA9394	This paper		Genotype: h- lam1∆::kanMX6
strain, strain background (S. pombe)	CA9396	This paper		Genotype: h- lam3∆::kanMX6
strain, strain background (S. pombe)	CA9398	This paper		Genotype: h- lam4∆::kanMX6
strain, strain background (S. pombe)	CA9400	This paper		Genotype: h- iml1∆::kanMX6
strain, strain background (S. pombe)	CA9402	This paper		Genotype: h- npr2∆::kanMX6
strain, strain background (S. pombe)	CA9404	This paper		Genotype: h- npr3∆::kanMX6
strain, strain background (S. pombe)	CA9417	This paper		Genotype: h- lam1:13myc(hph) lam2:5FLAG(kanMX6)
strain, strain background (S. pombe)	CA9420	This paper		Genotype: h- lam1:13myc(hph) lam3:5FLAG(kanMX6)
strain, strain background (S. pombe)	CA9423	This paper		Genotype: h- lam2:13myc(hph) lam1:5FLAG(kanMX6)
strain, strain background (S. pombe)	CA9426	This paper		Genotype: h- lam2:13myc(hph) lam3:5FLAG(kanMX6)
strain, strain background (S. pombe)	CA9429	This paper		Genotype: h- lam3:13myc(hph) lam2:5FLAG(kanMX6)
strain, strain background (S. pombe)	CA9432	This paper		Genotype: h- lam3:13myc(hph) lam1:5FLAG(kanMX6)
strain, strain background (S. pombe)	CA9470	This paper		Genotype: h- gtr1Q61L(kanMX6)
strain, strain background (S. pombe)	CA9473	This paper		Genotype: h- gtr1S16N(kanMX6)
strain, strain background (S. pombe)	CA9490	This paper		Genotype: h+ tor2-287 lam4∆::kanMX6
strain, strain background (S. pombe)	CA9497	This paper		Genotype: h- lam4:5FLAG(kanMX6)
strain, strain background (S. pombe)	CA9505	This paper		Genotype: h+ lam4:mEGFP(kanMX6)
strain, strain background (S. pombe)	CA9557	This paper		Genotype: h- tsc1∆::kanMX6
strain, strain background (S. pombe)	CA9560	This paper		Genotype: h- gtr1S16N(kanMX6) iml1∆::hph
strain, strain background (S. pombe)	CA9562	This paper		Genotype: h- gtr1S16N(kanMX6) npr2∆::hph
strain, strain background (S. pombe)	CA9564	This paper		Genotype: h- gtr1S16N(kanMX6) npr3∆::hph
strain, strain background (S. pombe)	CA9574	This paper		Genotype: h- gtr1Q61L(kanMX6) iml1∆::hph
strain, strain background (S. pombe)	CA9576	This paper		Genotype: h- gtr1∆::kanMX6 iml1∆::hph
strain, strain background (S. pombe)	CA9578	This paper		Genotype: h- gtr2∆::kanMX6 iml1∆::hph
strain, strain background (S. pombe)	CA9580	This paper		Genotype: h- gtr1Q61L(kanMX6) gtr2∆::hph
strain, strain background (S. pombe)	CA9582	This paper		Genotype: h- gtr1∆::kanMX6 gtr2∆::hph
strain, strain background (S. pombe)	CA9586	This paper		Genotype: h- gtr1Q61L(kanMX6) npr2∆::hph
strain, strain background (S. pombe)	CA9588	This paper		Genotype: h- gtr1Q61L(kanMX6) npr3∆::hph
strain, strain background (S. pombe)	CA9590	This paper		Genotype: h- gtr1S16N(kanMX6) gtr2∆::hph
strain, strain background (S. pombe)	CA9594	This paper		Genotype: h- npr3∆::kanMX6 iml1∆::hph
strain, strain background (S. pombe)	CA9596	This paper		Genotype: h- npr2∆::kanMX6 iml1∆::hph
strain, strain background (S. pombe)	CA9618	This paper		Genotype: h- npr3∆::kanMX6 npr2∆::hph
strain, strain background (S. pombe)	CA9659	DOI:10.1111/j.1365-2443.2006.01025.x		Genotype: h+ ura4-D18 tor2-13(ura4+)
strain, strain background (S. pombe)	CA9671	This paper		Genotype: h- lam1∆::kanMX6 gtr1∆::hph
strain, strain background (S. pombe)	CA9673	This paper		Genotype: h- lam2∆::kanMX6 gtr1∆::hph
strain, strain background (S. pombe)	CA9675	This paper		Genotype: h- lam3∆::kanMX6 gtr1∆::hph
strain, strain background (S. pombe)	CA9677	This paper		Genotype: h- lam4∆::kanMX6 gtr1∆::hph
strain, strain background (S. pombe)	CA9679	This paper		Genotype: h- lam1∆::kanMX6 gtr2∆::hph
strain, strain background (S. pombe)	CA9681	This paper		Genotype: h- lam2∆::kanMX6 gtr2∆::hph
strain, strain background (S. pombe)	CA9683	This paper		Genotype: h- lam3∆::kanMX6 gtr2∆::hph
strain, strain background (S. pombe)	CA9685	This paper		Genotype: h- lam4∆::kanMX6 gtr2∆::hph
strain, strain background (S. pombe)	CA9702	This paper		Genotype: h- tsc2∆::hph gtr1∆::kanMX6
strain, strain background (S. pombe)	CA9706	This paper		Genotype: h- npr2∆::kanMX6 gtr1∆::hph
strain, strain background (S. pombe)	CA9708	This paper		Genotype: h- npr3∆::kanMX6 gtr1∆::hph
strain, strain background (S. pombe)	CA9710	This paper		Genotype: h- npr2∆::kanMX6 gtr2∆::hph
strain, strain background (S. pombe)	CA9712	This paper		Genotype: h- npr3∆::kanMX6 gtr2∆::hph
strain, strain background (S. pombe)	CA9720	This paper		Genotype: h- npr3∆::kanMX6 npr2∆::hph iml1∆::nat
strain, strain background (S. pombe)	CA9722	This paper		Genotype: h- tsc1∆::kanMX6 gtr1∆::hph
strain, strain background (S. pombe)	CA9724	This paper		Genotype: h- tsc1∆::kanMX6 iml1∆::hph
strain, strain background (S. pombe)	CA9734	This paper		Genotype: h+ ura4-D18 tor2-13(ura4+) gtr1∆::hph
strain, strain background (S. pombe)	CA9887	This paper		Genotype: h- gtr1:mEGFP(kanMX6)
strain, strain background (S. pombe)	CA9889	This paper		Genotype: h- gtr2:mEGFP(kanMX6)
strain, strain background (S. pombe)	CA9891	This paper		Genotype: h- lam2:mEGFP(kanMX6)
strain, strain background (S. pombe)	CA9907	This paper		Genotype: h- tsc2∆::hph iml1∆::kanMX6
strain, strain background (S. pombe)	CA9911	This paper		Genotype: h- lam1:13myc(hph) lam4:5FLAG(kanMX6)
strain, strain background (S. pombe)	CA9915	This paper		Genotype: h- lam2:13myc(hph) lam4:5FLAG(kanMX6)
strain, strain background (S. pombe)	CA9919	This paper		Genotype: h- lam3:13myc(hph) lam4:5FLAG(kanMX6)
strain, strain background (S. pombe)	CA10032	This paper		Genotype: h+ ura4-D18 tor2-13(ura4+) iml1∆::kanMX6
strain, strain background (S. pombe)	CA10166	This paper		Genotype: h- gtr1:mEGFP(kanMX6) lam1∆::hph
strain, strain background (S. pombe)	CA10168	This paper		Genotype: h- gtr2:mEGFP(kanMX6) lam1∆::hph
strain, strain background (S. pombe)	CA10170	This paper		Genotype: h- lam2:mEGFP(kanMX6) lam1∆::hph
strain, strain background (S. pombe)	CA10172	This paper		Genotype: h+ lam3:mEGFP(kanMX6) lam1∆::hph
strain, strain background (S. pombe)	CA10174	This paper		Genotype: h+ lam4:mEGFP(kanMX6) lam1∆::hph
strain, strain background (S. pombe)	CA10191	This paper		Genotype: h- gtr2Q60L(kanMX6)
strain, strain background (S. pombe)	CA10195	This paper		Genotype: h- gtr2S17N(kanMX6)
strain, strain background (S. pombe)	CA10214	This paper		Genotype: h- ura4-D18 gtr1∆::ura4+ tor2E2221K(kanMX6)
strain, strain background (S. pombe)	CA10216	This paper		Genotype: h- ura4-D18 iml1∆::ura4+ tor2E2221K(kanMX6)
strain, strain background (S. pombe)	CA10224	This paper		Genotype: h- gtr1:mEGFP(kanMX6) gtr2∆::hph
strain, strain background (S. pombe)	CA10226	This paper		Genotype: h- gtr1:mEGFP(kanMX6) lam2∆::hph
strain, strain background (S. pombe)	CA10228	This paper		Genotype: h- gtr1:mEGFP(kanMX6) lam3∆::hph
strain, strain background (S. pombe)	CA10230	This paper		Genotype: h- gtr1:mEGFP(kanMX6) lam4∆::hph
strain, strain background (S. pombe)	CA10232	This paper		Genotype: h- gtr2:mEGFP(kanMX6) gtr1∆::hph
strain, strain background (S. pombe)	CA10234	This paper		Genotype: h- gtr2:mEGFP(kanMX6) lam2∆::hph
strain, strain background (S. pombe)	CA10236	This paper		Genotype: h- gtr2:mEGFP(kanMX6) lam3∆::hph
strain, strain background (S. pombe)	CA10238	This paper		Genotype: h- gtr2:mEGFP(kanMX6) lam4∆::hph
strain, strain background (S. pombe)	CA10240	This paper		Genotype: h+ lam1:mEGFP(kanMX6) gtr1∆::hph
strain, strain background (S. pombe)	CA10242	This paper		Genotype: h+ lam1:mEGFP(kanMX6) gtr2∆::hph
strain, strain background (S. pombe)	CA10244	This paper		Genotype: h+ lam1:mEGFP(kanMX6) lam2∆::hph
strain, strain background (S. pombe)	CA10246	This paper		Genotype: h+ lam1:mEGFP(kanMX6) lam3∆::hph
strain, strain background (S. pombe)	CA10248	This paper		Genotype: h+ lam1:mEGFP(kanMX6) lam4∆::hph
strain, strain background (S. pombe)	CA10254	This paper		Genotype: h- lam2:mEGFP(kanMX6) gtr1∆::hph
strain, strain background (S. pombe)	CA10256	This paper		Genotype: h- lam2:mEGFP(kanMX6) gtr2∆::hph
strain, strain background (S. pombe)	CA10258	This paper		Genotype: h+ lam3:mEGFP(kanMX6) gtr1∆::hph
strain, strain background (S. pombe)	CA10260	This paper		Genotype: h+ lam3:mEGFP(kanMX6) gtr2∆::hph
strain, strain background (S. pombe)	CA10262	This paper		Genotype: h+ lam4:mEGFP(kanMX6) gtr1∆::hph
strain, strain background (S. pombe)	CA10264	This paper		Genotype: h+ lam4:mEGFP(kanMX6) gtr2∆::hph
strain, strain background (S. pombe)	CA10266	This paper		Genotype: h+ lam3:mEGFP(kanMX6) lam2∆::hph
strain, strain background (S. pombe)	CA10268	This paper		Genotype: h+ lam4:mEGFP(kanMX6) lam2∆::hph
strain, strain background (S. pombe)	CA10270	This paper		Genotype: h- lam2:mEGFP(kanMX6) lam3∆::hph
strain, strain background (S. pombe)	CA10272	This paper		Genotype: h+ lam4:mEGFP(kanMX6) lam3∆::hph
strain, strain background (S. pombe)	CA10274	This paper		Genotype: h- lam2:mEGFP(kanMX6) lam4∆::hph
strain, strain background (S. pombe)	CA10276	This paper		Genotype: h+ lam3:mEGFP(kanMX6) lam4∆::hph
strain, strain background (S. pombe)	CA10333	This paper		Genotype: h- lam1GA:GFPS65T(hph)
strain, strain background (S. pombe)	CA10336	This paper		Genotype: h- lam1CCAA:GFPS65T(hph)
strain, strain background (S. pombe)	CA10339	This paper		Genotype: h- lam1LLAA:GFPS65T(hph)
strain, strain background (S. pombe)	CA10361	This paper		Genotype: h- pub1∆::hph
strain, strain background (S. pombe)	CA10373	This paper		Genotype: h- gtr1:13myc(hph) gtr2:13myc(nat)
strain, strain background (S. pombe)	CA10377	This paper		Genotype: h- gtr1:13myc(hph) gtr2:13myc(nat) lam1:5FLAG(kanMX6)
strain, strain background (S. pombe)	CA10380	This paper		Genotype: h- gtr1:13myc(hph) gtr2:13myc(nat) lam2:5FLAG(kanMX6)
strain, strain background (S. pombe)	CA10383	This paper		Genotype: h- gtr1:13myc(hph) gtr2:13myc(nat) lam3:5FLAG(kanMX6)
strain, strain background (S. pombe)	CA10386	This paper		Genotype: h- gtr1:13myc(hph) gtr2:13myc(nat) lam4:5FLAG(kanMX6)
strain, strain background (S. pombe)	CA10409	This paper		Genotype: h+ ura4-D18 tor2-13(ura4+) npr2∆::hph
strain, strain background (S. pombe)	CA10411	This paper		Genotype: h+ ura4-D18 tor2-13(ura4+) npr3∆::hph
strain, strain background (S. pombe)	CA10413	This paper		Genotype: h+ ura4-D18 tor2-13(ura4+) lam1∆::hph
strain, strain background (S. pombe)	CA10415	This paper		Genotype: h+ ura4-D18 tor2-13(ura4+) lam2∆::hph
strain, strain background (S. pombe)	CA10417	This paper		Genotype: h+ ura4-D18 tor2-13(ura4+) lam3∆::hph
strain, strain background (S. pombe)	CA10419	This paper		Genotype: h+ ura4-D18 tor2-13(ura4+) lam4∆::hph
strain, strain background (S. pombe)	CA10421	This paper		Genotype: h+ ura4-D18 tor2-13(ura4+) gtr2∆::hph
strain, strain background (S. pombe)	CA10670	This paper		Genotype: h- gtr1:mEGFP(kanMX6) iml1∆::hph
strain, strain background (S. pombe)	CA10672	This paper		Genotype: h- gtr1:mEGFP(kanMX6) npr2∆::hph
strain, strain background (S. pombe)	CA10674	This paper		Genotype: h- gtr1:mEGFP(kanMX6) npr3∆::hph
strain, strain background (S. pombe)	CA10676	This paper		Genotype: h- gtr2:mEGFP(kanMX6) iml1∆::hph
strain, strain background (S. pombe)	CA10678	This paper		Genotype: h- gtr2:mEGFP(kanMX6) npr2∆::hph
strain, strain background (S. pombe)	CA10680	This paper		Genotype: h- gtr2:mEGFP(kanMX6) npr3∆::hph
strain, strain background (S. pombe)	CA10708	This paper		Genotype: h- lam1GCCAAA:GFPS65T(hph)
strain, strain background (S. pombe)	CA11027	This paper		Genotype: h- npr3:13myc(hph) P3nmt1:5FLAG:npr2(kanMX6)
strain, strain background (S. pombe)	CA11236	This paper		Genotype: h- pub1∆::hph gtr1∆::kanMX6
strain, strain background (S. pombe)	CA11244	This paper		Genotype: h- pub1∆::hph iml1∆::kanMX6
strain, strain background (S. pombe)	CA11250	This paper		Genotype: h- cat1:mNeonGreen(hph) gtr1∆::kanMX6
strain, strain background (S. pombe)	CA11258	This paper		Genotype: h- cat1:mNeonGreen(hph) iml1∆::kanMX6
strain, strain background (S. pombe)	CA11268	This paper		Genotype: h- cat1:mNeonGreen(hph)
strain, strain background (S. pombe)	CA11415	This paper		Genotype: h- ura4-D18 gtr1∆::ura4+ tor2E2221K(kanMX6) rhb1∆::hph
strain, strain background (S. pombe)	CA11417	This paper		Genotype: h- ura4-D18 iml1∆::ura4+ tor2E2221K(kanMX6) rhb1∆::hph
strain, strain background (S. pombe)	CA11433	This paper		Genotype: h- lam1:NLS:GCCAAA:mCherry(kanMX6) gtr2:GFPS65T(hph)
strain, strain background (S. pombe)	CA11459	This paper		Genotype: h+ mip1:mEGFP:GFP(hph)
strain, strain background (S. pombe)	CA11461	This paper		Genotype: h+ iml1:mEGFP:GFP(hph)
strain, strain background (S. pombe)	CA11491	This paper		Genotype: h- any1∆::hph
strain, strain background (S. pombe)	CA11495	This paper		Genotype: h- any1∆::hph gtr1∆::kanMX6
strain, strain background (S. pombe)	CA11497	This paper		Genotype: h- any1∆::hph iml1∆::kanMX6
strain, strain background (S. pombe)	CA11536	This paper		Genotype: h- lam1:NLS:GCCAAA:mCherry(kanMX6) gtr1:GFP(hph)
strain, strain background (S. pombe)	CA11540	This paper		Genotype: h- lam1:NLS:GCCAAA:mCherry(kanMX6) mip1:mEGFP:GFP (hph)
strain, strain background (S. pombe)	CA11617	This paper		Genotype: h- ura4-D18 pub1∆::ura4+ cat1:mNeonGreen(kanMX6)
strain, strain background (S. pombe)	CA11619	This paper		Genotype: h- ura4-D18 pub1∆::ura4+ cat1:mNeonGreen(kanMX6) gtr1∆::hph
strain, strain background (S. pombe)	CA11621	This paper		Genotype: h- ura4-D18 pub1∆::ura4+ cat1:mNeonGreen(kanMX6) iml1∆::hph
strain, strain background (S. pombe)	CA11747	This paper		Genotype: h- iml1:mEGFP:GFP(hph) gtr1∆::kanMX6
strain, strain background (S. pombe)	CA11749	This paper		Genotype: h- iml1:mEGFP:GFP(hph) gtr2∆::kanMX6
strain, strain background (S. pombe)	CA11751	This paper		Genotype: h- iml1:mEGFP:GFP(hph) npr2∆::kanMX6
strain, strain background (S. pombe)	CA11753	This paper		Genotype: h- iml1:mEGFP:GFP(hph) npr3∆::kanMX6
strain, strain background (S. pombe)	CA11755	This paper		Genotype: h- iml1:mEGFP:GFP(hph) lam1∆::kanMX6
strain, strain background (S. pombe)	CA11757	This paper		Genotype: h- iml1:mEGFP:GFP(hph) lam1:NLS:GCCAAA:mCherry(kanMX6)
strain, strain background (S. pombe)	CA11799	This paper		Genotype: h- mip1:mEGFP:GFP(hph) gtr1∆::kanMX6
strain, strain background (S. pombe)	CA11801	This paper		Genotype: h- mip1:mEGFP:GFP(hph) gtr2∆::kanMX6
strain, strain background (S. pombe)	CA11805	This paper		Genotype: h- mip1:mEGFP:GFP(hph) lam1∆::kanMX6
strain, strain background (S. pombe)	CA12152	This paper		Genotype: h- cat1:mNeonGreen(hph) any1∆::nat
strain, strain background (S. pombe)	CA12154	This paper		Genotype: h- cat1:mNeonGreen(hph) any1∆::nat gtr1∆::kanMX6
strain, strain background (S. pombe)	CA12158	This paper		Genotype: h- cat1:mNeonGreen(hph) any1∆::nat iml1∆::kanMX6
strain, strain background (S. pombe)	CA13711	This paper		Genotype: h- iml1R854A:13myc(hph)
strain, strain background (S. pombe)	CA13833	This paper		Genotype: h- ura4-D18 sck1:5FLAG(ura4+) gtr1∆::hph
strain, strain background (S. pombe)	CA13835	This paper		Genotype: h- ura4-D18 sck1:5FLAG(ura4+) gtr2∆::hph
strain, strain background (S. pombe)	CA13837	This paper		Genotype: h- ura4-D18 sck1:5FLAG(ura4+) iml1∆::hph
strain, strain background (S. pombe)	CA13838	This paper		Genotype: h- ura4-D18 sck1:5FLAG(ura4+) tsc2∆::hph
strain, strain background (S. pombe)	CA101	Laboratory stock		Genotype: h- leu1-32
strain, strain background (S. pombe)	CA10007	This paper		Genotype: h- leu1-32 gtr1∆::hph
strain, strain background (S. pombe)	CA10304	This paper		Genotype: h- leu1-32 iml1∆::hph
strain, strain background (S. pombe)	CA14202	Laboratory stock		Genotype: h+ arg3-D4
strain, strain background (S. pombe)	CA14295	This paper		Genotype: h- arg3-D4 gtr1∆::kanMX6
strain, strain background (S. pombe)	CA14298	This paper		Genotype: h- arg3-D4 iml1∆::kanMX6
antibody	anti-phospho-p70 S6K (Thr389) (mouse monoclonal)	Cell Signaling Technology	#9206	(1:4000)
antibody	anti-Psk1 (rabbit polyclonal)	This paper	N/A	(1:5000)
antibody	anti-Spc1 (rabbit polyclonal)	DOI:10.1128/MCB.23.15.5132-5142.2003	N/A	(1:10000)
antibody	anti-FLAG M2 (mouse monoclonal)	Sigma-Aldrich	F3165; RRID:AB_259529	(1:4000)
antibody	anti-c-myc (mouse monoclonal)	Covance	9E10: RRID:AB_291322	(1:4000)
antibody	anti-c-myc (rabbit polyclonal)	Santa Cruz Biotechnology	A-14; RRID:AB_631274	(1:4000)
antibody	anti-GFP (mouse monoclonal)	Roche	11814460001; RRID:AB_390913	(1:1000)
antibody	anti-rabbit IgG (H+L), HRP conjugate (polyclonal)	Promega	W4011; RRID:AB_430833	(1:2000)
antibody	anti-mouse IgG (H+L), HRP conjugate (polyclonal)	Promega	W4021; RRID:AB_430834	(1:2000)
commercial assay or kit	SuperSignal West Pico Chemiluminescent Substrate	Thermo Scientific	34080
commercial assay or kit	SilverQuest staining kit	Invitrogen	LC6070
chemical compound, drug	R-5000 Rapamycin	LC Laoratories	53123-88-9
chemical compound, drug	Caffeine, anhydrous	Nacalai Tesque	06712-42
chemical compound, drug	FM4-64 dye	Invitrogen	T13320
chemical compound, drug	SynaptoRed C2 (FM4-64)	Biotium	70021
